# Supplementary material for: Physiotherapists Using the Biopsychosocial Model for Chronic Pain: Barriers and Facilitators—A Scoping Review
Source: MDPI journal article supplement (doi:10.3390/ijerph20021634), 2023-01-16
Supplement: s1 [file s1]

**Table S1.** Characteristics of the included studies

| First author     | Year | Country  | Methodology     | Classification using typology of Sandelowski & Barroso | Method of analysis                                                                       | Tools                                                         | N. included                                                         | Focus                                                                                                                         |
|------------------|------|----------|-----------------|--------------------------------------------------------|------------------------------------------------------------------------------------------|---------------------------------------------------------------|---------------------------------------------------------------------|-------------------------------------------------------------------------------------------------------------------------------|
| Al Zoubi [25]    | 2019 | Canada   | Qualitative     | Thematic survey                                        | Directed content analysis using the TDF as a framework                                   | Interviews                                                    | 13 chiropractors and 14 PTs                                         | Implementation of stratified care                                                                                             |
| Beissner [21]    | 2009 | USA      | Cross-sectional | Topical survey                                         | Associations were assessed in statistical general linear models                          | Survey                                                        | 152 members of the Geriatrics and Orthopaedics sections of the APTA | Use of CBT for older adults with chronic pain                                                                                 |
| Caeiro [38]      | 2019 | Portugal | Qualitative     | Conceptual / thematic description                      | Thematic analysis                                                                        | Focus group interviews                                        | 2 focus groups: 1 with 6 GPs and 1 with 6 PTs                       | Implementation of stratified care                                                                                             |
| Cowell [46]      | 2019 | UK       | Qualitative     | Conceptual / thematic description                      | Conversation analysis                                                                    | Videorecordings of consultations                              | 20 initial PT consultations (10 PTs and 20 patients)                | PTs solicitation and exploration of patients' concerns in back pain consultations                                             |
| Cowell [26]      | 2018 | UK       | Qualitative     | Conceptual / thematic description                      | Thematic analysis                                                                        | Interviews                                                    | 10 PTs                                                              | Perceptions of physiotherapists towards the management of NSCLBP from a BPS perspective                                       |
| Demmelmaier [39] | 2012 | Sweden   | mixed methods   | n.a. / topical survey                                  | Descriptive and statistical analysis                                                     | Audiorecordings of consultations                              | 4 PTs in primary health care 63 consultations with patients         | Tailored skills training for practitioners to enhance assessment of prognostic factors for persistent and disabling back pain |
| Denneny [27]     | 2020 | UK       | Qualitative     | Conceptual / thematic description                      | Thematic analysis and comparison with defined CBT competencies                           | Observations (using videorecordings) and interviews           | 4 experienced PTs                                                   | The application of psychologically informed practice                                                                          |
| Emilson [44]     | 2016 | Sweden   | Qualitative     | Topical survey / thematic survey                       | A descriptive and explorative research design with both deductive and inductive analysis | Videorecordings                                               | 12 PTs                                                              | Explore and describe PTs' assessments, analyses and use of BCTs                                                               |
| França [36]      | 2019 | Brazil   | Qualitative     | Conceptual / thematic description                      | Phenomenological approach with stepwise analysis as proposed by Pope et al. (2000)       | Interviews                                                    | 10 PTs                                                              | Perspectives and beliefs of newly graduated PTs about the BPS model                                                           |
| Fritz [40]       | 2020 | Sweden   | mixed methods   | n.a. / topical survey                                  | Descriptive and non-parametric statistical methods used for analysis                     | Questionnaire, observations, self-reports and patient records | control group: 9 PTs<br>experimental group 15 PTs                   | Implementation of a behavioral medicine approach in physiotherapy                                                             |

**Table S1.** Characteristics of the included studies

|                 |      |             |                                                  |                                   |                                                                                                                                  |                                                                     |                                                                                                                    |                                                                                                                                                        |
|-----------------|------|-------------|--------------------------------------------------|-----------------------------------|----------------------------------------------------------------------------------------------------------------------------------|---------------------------------------------------------------------|--------------------------------------------------------------------------------------------------------------------|--------------------------------------------------------------------------------------------------------------------------------------------------------|
| Fritz [28]      | 2018 | Sweden      | Qualitative                                      | Conceptual / thematic description | Inductive content analysis and cross-case analysis, followed by mapping to the domains within the Implementation of Change Model | Interviews                                                          | 4 cases consisting of a PT with a BM education, a patient with persistent pain, and a manager, acting in a context | Integrating a behavioral medicine approach into physiotherapy clinical practice                                                                        |
| Holopainen [24] | 2020 | Finland     | Qualitative                                      | Interpretive explanation          | Phenomenographic approach                                                                                                        | Interviews                                                          | 22 PTs                                                                                                             | PT's conceptions of learning and integrating CFT into clinical practice                                                                                |
| Jeffrey [35]    | 2012 | UK          | Qualitative                                      | Conceptual / thematic description | Phenomenological analysis using the hermeneutical circle to identify key themes                                                  | Interviews                                                          | 11 PTs                                                                                                             | PTs' experiences and feelings of managing patients with NSLBP                                                                                          |
| Man [43]        | 2019 | Australia   | Quantitative                                     | n.a. / topical survey             | Statistical analysis                                                                                                             | Online survey                                                       | 181 fully completed questionnaires                                                                                 | An exploration of PS practice within private practice musculoskeletal physiotherapy                                                                    |
| Matthews [41]   | 2015 | Ireland     | Qualitative                                      | Thematic survey                   | Exploring TDF domains for targeted behaviour and identifying barriers and enablers                                               | Focus groups and pilot-testing                                      | 9 PTs working in primary care                                                                                      | Develop and pilot-test an implementation intervention to support PTs in using an autonomy supportive communication style for promoting self-management |
| Nielsen [42]    | 2014 | Australia   | Qualitative                                      | Conceptual / thematic description | Framework Analysis                                                                                                               | Interviews                                                          | 8 PTs trained to deliver PCST                                                                                      | PTs' experiences and perspectives of a CBT-informed intervention process for adults with painful knee OA                                               |
| Oostendorp [34] | 2015 | Netherlands | observational prospective cross-sectional design | Topical survey                    | Descriptive and statistical analysis                                                                                             | Scoring dimensions of the SCEBS method using the process indicators | 20 MTPs contributed 108 patient audio recordings                                                                   | Develop and evaluate process indicators relevant to biopsychosocial history taking in patients with chronic back and neck pain by using SCEBS method   |
| Richmond [33]   | 2018 | UK          | Qualitative                                      | Conceptual / thematic description | Constructivist approach with inductive thematic analysis Themes found categorized using the TDF                                  | Interviews                                                          | 11 PTs                                                                                                             | Experiences of implementing a CBA for LBP after completing online course (iBeST)                                                                       |
| Sanders [31]    | 2013 | UK          | Qualitative                                      | Conceptual / thematic description | Secondary analysis with inductive approach using the BPS model as a frame                                                        | Interviews                                                          | 12 PTs                                                                                                             | PTs' approaches to back pain care in the context of addressing patients'                                                                               |

**Table S1.** Characteristics of the included studies

[illegible]
